# Supplementary material
Source: PubMed Central journal article supplement (PMC5476459)
Supplement: NIHMS864895-supplement-309443_Online.pdf [file NIHMS864895-supplement-309443_Online.pdf]

Online Table I. Baseline characteristics by disease status during follow-up in 1992-2014

| Variables                                          | Disease group/case fatality |           |           |
|----------------------------------------------------|-----------------------------|-----------|-----------|
|                                                    | Nonfatal MI                 | Fatal CHD | CHD-free  |
| N                                                  | 1964                        | 408       | 73990     |
| Age (years)                                        | 61.1±6.5                    | 63.9±5.7  | 58.3±7.1  |
| BMI (kg/m <sup>2</sup> )                           | 27.2±5.4                    | 28.1±4.8  | 26.0±5.0  |
| Census-track median family income (in thousands)   | 61.7±23.5                   | 61.1±20.3 | 65.0±25.7 |
| Current smoker (%)                                 | 26.2                        | 27.3      | 13.7      |
| Pack-years of cigarette smoking                    | 18.5±21.1                   | 21.4±20.4 | 12.8±18.8 |
| Alcohol (g/d) †                                    | 4.3±8.7                     | 5.0±8.5   | 5.2±9.5   |
| Physical activity (METs/week)                      | 16.5±18.9                   | 16.0±16.6 | 19.4±23.4 |
| Alternative health diet index-2010 †               | 46.8±10.3                   | 47.3±8.2  | 48.3±10.3 |
| High blood pressure (%)                            | 44.9                        | 55.6      | 31.1      |
| Clinician diagnosed type 2 diabetes (%)            | 11.0                        | 24.1      | 3.6       |
| Elevated cholesterol (%)                           | 54.5                        | 55.2      | 43.3      |
| Parental history of MI (%)                         | 27.1                        | 26.4      | 18.2      |
| College graduate or above in husband education (%) | 46.3                        | 47.0      | 55.0      |
| Master degree or above in nurses' education (%)    | 7.8                         | 6.8       | 10.0      |
| Depression (MHI-5 ≤ 52), %                         | 9.1                         | 11.0      | 7.8       |
| Time to event (years)                              | 10.0±5.5                    | 8.2±3.9   | N/A       |
| Social integration index level, %                  |                             |           |           |
| I (lowest)                                         | 28.2                        | 31.6      | 26.2      |
| II                                                 | 15.2                        | 15.8      | 15.9      |
| III                                                | 34.2                        | 33.4      | 33.4      |
| IV (highest)                                       | 22.4                        | 19.3      | 24.5      |

\* All characteristics are obtained from 1992 questionnaire, except if otherwise indicated. All values are age-adjusted except for age itself.

† Information on alcohol consumption and alternative health diet index were obtained from 1990 questionnaire. Values are mean±SD or percentages and are standardized to the age distribution of the study population.

Online Table II. Age- and multivariable-adjusted hazard ratios for coronary heart disease and subcategories according to level of social integration index score at baseline, Nurses' Health Study, 1992-2014 (n=76,362)\*

|                                                              | Social integration index level |                  |                  |                  | <i>p</i> -for-trend |
|--------------------------------------------------------------|--------------------------------|------------------|------------------|------------------|---------------------|
|                                                              | I (lowest)                     | II               | III              | IV (highest)     |                     |
| <b>Total CHD</b>                                             |                                |                  |                  |                  |                     |
| Age-adjusted Hazard Ratio (95% CI)                           | 1.00 (referent)                | 0.94 (0.84-1.04) | 0.89 (0.74-0.96) | 0.81 (0.73-0.91) | 0.0003              |
| Multivariable-Adjusted Hazard Ratio (95% CI) Model 1 (MV1) † | 1.00 (referent)                | 0.93 (0.84-1.03) | 0.88 (0.73-0.96) | 0.81 (0.72-0.90) | 0.0002              |
| Multivariable-Adjusted Hazard Ratio (95% CI) Model 2 (MV2) ‡ | 1.00 (referent)                | 0.94 (0.82-1.04) | 0.90 (0.74-0.97) | 0.83 (0.74-0.93) | 0.002               |
| Multivariable-Adjusted Hazard Ratio (95% CI) Model 3 (MV3) § | 1.00 (referent)                | 0.94 (0.85-1.05) | 0.90 (0.84-1.10) | 0.84 (0.85-0.94) | 0.002               |
| Multivariable-Adjusted Hazard Ratio (95% CI) Model 4 (MV4)   | 1.00 (referent)                | 1.00 (0.90-1.11) | 1.01 (0.89-1.15) | 0.97 (0.86-1.09) | 0.67                |
| <b>Nonfatal MI</b>                                           |                                |                  |                  |                  |                     |
| Age-adjusted Hazard Ratio (95% CI)                           | 1.00 (referent)                | 0.96 (0.85-1.08) | 0.93 (0.81-1.06) | 0.87 (0.77-0.98) | 0.02                |
| Multivariable-Adjusted Hazard Ratio (95% CI) Model 1 (MV1) † | 1.00 (referent)                | 0.95 (0.85-1.07) | 0.92 (0.80-1.06) | 0.86 (0.76-0.98) | 0.02                |
| Multivariable-Adjusted Hazard Ratio (95% CI) Model 2 (MV2) ‡ | 1.00 (referent)                | 0.96 (0.85-1.08) | 0.93 (0.81-1.07) | 0.88 (0.78-1.00) | 0.05                |
| Multivariable-Adjusted Hazard Ratio (95% CI) Model 3 (MV3) § | 1.00 (referent)                | 0.96 (0.85-1.08) | 0.93 (0.81-1.07) | 0.88 (0.77-0.99) | 0.04                |
| Multivariable-Adjusted Hazard Ratio (95% CI) Model 4 (MV4)   | 1.00 (referent)                | 1.01 (0.90-1.14) | 1.03 (0.90-1.19) | 1.01 (0.89-1.15) | 0.84                |
| <b>Fatal CHD</b>                                             |                                |                  |                  |                  |                     |
| Age-adjusted Hazard Ratio (95% CI)                           | 1.00 (referent)                | 0.85 (0.67-1.08) | 0.75 (0.55-1.01) | 0.60 (0.46-0.79) | 0.0002              |
| Multivariable-Adjusted Hazard Ratio (95% CI) Model 1 (MV1) † | 1.00 (referent)                | 0.84 (0.66-1.07) | 0.74 (0.54-1.00) | 0.60 (0.45-0.79) | 0.0002              |
| Multivariable-Adjusted Hazard Ratio (95% CI) Model 2 (MV2) ‡ | 1.00 (referent)                | 0.86 (0.67-1.10) | 0.76 (0.56-1.03) | 0.64 (0.48-0.84) | 0.001               |
| Multivariable-Adjusted Hazard Ratio (95% CI) Model 3 (MV3) § | 1.00 (referent)                | 0.87 (0.68-1.12) | 0.78 (0.58-1.07) | 0.67 (0.51-0.89) | 0.005               |
| Multivariable-Adjusted Hazard Ratio (95% CI) Model 4 (MV4)   | 1.00 (referent)                | 0.93 (0.73-1.19) | 0.91 (0.66-1.23) | 0.79 (0.60-1.06) | 0.12                |

\* Social integration and all covariates were collected at baseline in 1992

† MV1 adjusted for age (continuous), husband's highest education (some high school or below, high school graduate, or college graduate and above), nurse's academic degree (RN associate or bachelor, master, or doctoral degree), and census-tract median family income (<65,000, ≥65,000 per year).

‡ MV2 adjusted for variables in MV1 plus history of hypertension (yes/no), diabetes (yes/no), high cholesterol (yes/no), and parental history of myocardial infarction < 60 years old (yes/no) at baseline

§ MV3 adjusted for variables in MV2 plus depressive symptoms (5-item Mental Health Index score of 86-100, 76-85, 53-75, 0-52)

|| MV4 adjusted for variables in MV3 plus pack-years of cigarette smoking (never, >0-10, >10-20, >20), alcohol drinking (0, 0.1-4.9, 5.0-14.9, or  $\geq$ 15.0 grams per day), physical activity (<3, 3-8.9, 9-17.9, 18-26.9, or  $\geq$ 27 METs/wk), alternative health diet index-2010 dietary score (in quartiles), and body mass index (<18.5, 18.5-24.9, 25.0-29.9, or  $\geq$ 30)

Abbreviations: CHD, coronary heart disease; MI, myocardial infarction; HR, hazard ratio; CI, confidence interval
